# Supplementary material for: Manipulating the inter pillar gap in pillar array ultra-thin layer planar chromatography platforms
Source: Royal Society of Chemistry journal article supplement (doi:10.1039/c5an02274f), 2016-01-01
Supplement: c5an02274f1.pdf [file c5an02274f1.pdf]

## Supporting information for “Manipulating inter pillar gap in pillar array ultra-thin layer planar chromatography platforms”

Nichole A. Crane<sup>a</sup>, Nickolay V. Lavrik<sup>b</sup>, and Michael J. Sepaniak<sup>\*,a</sup>

<sup>a</sup>Department of Chemistry, University of Tennessee, Knoxville, TN, 37996, USA.

<sup>b</sup>Center for Nanophase Materials Sciences, Oak Ridge National Laboratory, Oak Ridge, TN, 37830, USA.

### Table of Contents:

1. Additional Results & Discussion
  - a. Optimum Flow Rates and Development Distances
  - b. Hypothetical Resolution & Calculations
  - c. Surface Areas and Volumes of Different Gap Scenarios
  - d. Complete Efficiency and Retention Data

### Optimum Flow Rates and Development Distances

| Morphology | Optimum Velocity (cm/s) |       | Modeled Distance (cm) |      | Experimental Distance (cm) |       |
|------------|-------------------------|-------|-----------------------|------|----------------------------|-------|
|            | ACN                     | IPA   | ACN                   | IPA  | ACN                        | IPA   |
| 1.9D1.1G   | 0.32                    | 0.064 | 0.64                  | 0.41 | 0.35                       | 0.18  |
| 2.2D0.8G   | 0.44                    | 0.088 | 0.47                  | 0.33 | 0.19                       | 0.045 |
| 2.5D0.5G   | 0.71                    | 0.14  | 0.28                  | 0.17 | 0.047                      | 0.031 |
| 1.2D0.8G   | 0.44                    | 0.088 | 0.30                  | 0.19 | 0.35                       | 0.21  |

**Table 1:** Calculated optimum velocities and corresponding development distances for the different pillar arrays.

### Hypothetical Resolution and Calculations

A consequence of reducing velocity as the solvent front moves can be that there are diminishing improvements in resolution as the development proceeds. Resolution calculations are performed using traditional chromatography equations. First considering the van Deemter equation used for these pillar systems and relating it to the variance per unit length (Equation S.I. 1).

$$H = \frac{B}{v} + C_m \cdot v = \frac{\sigma^2}{L} \quad (1)$$

Using the modeled velocities (Figure 2) and experimental velocities (Figure 3) and the treatment in the text for computing plate height, the instantaneous variance ( $\sigma^2$ ) over incremental small displacement of

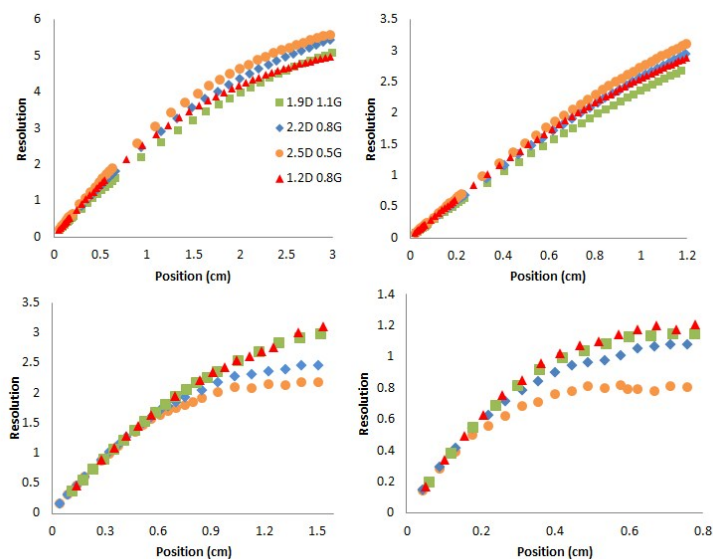

**Figure S.I. 1:** Computed Resolution with development distance for modeled (a, acetonitrile & b, 2-propanol) and experimental (c, acetonitrile & d, 2-propanol) flow velocities.

the solvent,  $\Delta d$ , can be determined via Eq S.I. 2. The modeled data corresponds to time increments of 0.01 to 1 second and this translates into distance increments of 0.003 to 0.200 cm depending on the point in the development.

$$\sigma_{inst} = ((\Delta d) \times H)^{1/2} \quad (2)$$

In order to determine resolution the sum of instantaneous variances was performed (Eq. S.I. 3):

$$\sigma_{sum} = (\sigma_{inst1}^2 + \sigma_{inst2}^2 + \dots)^{1/2} \quad (3)$$

Once the  $\sigma_{sum}$  value was found, a couple assumptions are made to compare each individual gapped scenario. We assumed typical retardation factors of 0.9 ( $R_{f1}$ ) and 0.8 ( $R_{f2}$ ) for the separation pair. In most of our studies the spot size of analytes are approximately 300  $\mu\text{m}$ . Therefore, the value for  $\sigma_{spot}$  in the resolution equation is 0.0075 cm. The final equation for resolution becomes:

$$Rs = \frac{(R_{f1} - R_{f2}) \times S_f}{4(\sigma_{sum}^2 + \sigma_{spot}^2)^{1/2}} \quad (4)$$

The  $S_f$  in this equation corresponds to the distance the solvent front traveled. Figure S.I. 1 provides the calculated Rs with position on the array during the development.

For our modeled systems in the figure, it appears that all the gapped scenarios reach an ideal Rs of 1.5 around 0.50 cm and 0.75 cm of development distance for acetonitrile and 2-propanol, respectively. The poorer performance in terms of Rs for 2-propanol is due to its lower  $\gamma/\eta$  ratio, overall slower flow, and hence lower plate height. For each solvent the flows are similar with changing gap size and therefore produce similar Rs versus distance plots.

The most telling observation from the modeled plots is the smaller increases in Rs as the solvent front slows later in the development. For example, if the 2.2D 0.8G acetonitrile case is considered the increase in resolution between positions 0.5 cm to 1.0 cm is 104% but from 2.0 to 2.5 it is only 10.2%. In most cases there is little motivation to develop beyond  $S_f = 2.0$  cm. The situation for the experimental data demonstrates the 2.2D 0.8G acetonitrile case as a resolution increase of 62.6% from 0.1 cm to 0.2 cm and an 8.60% increase from 0.6 cm to 0.7 cm. The experimental data concludes that a high vapor pressure mobile phase solvent only needs a development distance of less than 1 cm.

### Surface Areas and Volumes of Different Gap Scenarios

| Chip Description |     | $(V_p) * N_p$                  | $V = \pi r^2 h$                              | $V = l * w * h$             | $V_c - TV_p$          | $(VV/V_c) * 100$ | $SA = 2\pi r * h$   | $SA_T = SA * N_p$ |
|------------------|-----|--------------------------------|----------------------------------------------|-----------------------------|-----------------------|------------------|---------------------|-------------------|
| Pillar           | Gap | Total Pillar Volume ( $TV_p$ ) | Individual Pillar Volume ( $V_p$ ) (microns) | Total Chip Volume ( $V_c$ ) | Void Volume ( $V_v$ ) | Void Volume (%)  | Surface Area/pillar | Surface Area/Chip |
| 1.9              | 1.1 | 8.7E+08                        | 45                                           | 2.4E+09                     | 1.5E+09               | 64               | 96                  | 1.8E+09           |
| 2.2              | 0.8 | 1.2E+09                        | 61                                           | 2.4E+09                     | 1.2E+09               | 51               | 110                 | 2.1E+09           |
| 2.5              | 0.5 | 1.5E+09                        | 79                                           | 2.4E+09                     | 8.9E+08               | 37               | 130                 | 2.4E+09           |
| 1.2              | 0.8 | 7.8E+08                        | 18                                           | 2.4E+09                     | 1.6E+09               | 67               | 60                  | 2.6E+09           |

**Table 2:** Calculated surface areas and volumes for the different pillar arrays in  $\mu\text{m}$ .

### Complete Efficiency and Retention Data

| Gap Dimensions | Analyte | Band Width (um) | Plate Height (um) | Retardation Factor | Solvent Front (mm) |
|----------------|---------|-----------------|-------------------|--------------------|--------------------|
| 1.9D 1.1G      | C540A   | 580 ± 59        | 2.5 ± 0.6         | 0.73 ± 0.04        | 14 ± 0.4           |
|                | C120    | 700 ± 90        | 2.7 ± 0.6         | 0.97 ± 0.001       |                    |
| 2.2D 0.8G      | C540A   | 790 ± 110       | 6.8 ± 1.5         | 0.64 ± 0.05        | 11 ± 0.3           |
|                | C120    | 750 ± 88        | 4.7 ± 1.3         | 0.86 ± 0.05        |                    |
| 2.5D 0.5G      | C540A   | 560 ± 17        | 11 ± 1.2          | 0.57 ± 0.1         | 6.2 ± 0.1          |
|                | C120    | 610 ± 56        | 8.1 ± 2.0         | 0.85 ± 0.07        |                    |
| 1.2D 0.8G      | C540A   | 940 ± 170       | 7.9 ± 2.8         | 0.76 ± 0.08        | 12 ± 1.1           |
|                | C120    | 650 ± 22        | 2.9 ± 0.1         | 0.98 ± 0.006       |                    |

**Table 3:** Average separation values (n=3) at 4 minute development corresponding to Figure 4 of manuscript.
